# Supplementary material for: Isolation, Characterization, and Genome Analysis of a Novel Bacteriophage, Escherichia Phage vB_EcoM-4HA13, Representing a New Phage Genus in the Novel Phage Family Chaseviridae
Source: MDPI journal article supplement (doi:10.3390/v14112356), 2022-10-26
Supplement: s1 [file s1]

# Supplementary Materials

**Table S1.** *E. coli* strains and 4HA13 Host Range.

|                                           | Serotype      | AMR                                              | Strain Number | Isolation Source | Source             | Host Range |      |
|-------------------------------------------|---------------|--------------------------------------------------|---------------|------------------|--------------------|------------|------|
|                                           |               |                                                  |               |                  |                    | PHIDA      | EOP  |
| Generic<br><i>E. coli</i>                 | O2:H7         | N/A                                              | HA2018074     | Human UTI        | AAFC               | N          | 0%   |
|                                           | O25:H4        | N/A                                              | HA2018075     | Human UTI        | AAFC               | N          | 0%   |
|                                           | O28:NM        | N/A                                              | HA2018076     | Human UTI        | AAFC               | N          | 0%   |
|                                           | O82:DM3Na     | N/A                                              | HA2018076     | Unknown          | AAFC               | N          | 0%   |
|                                           | O114:H4       | N/A                                              | HA2018078     | Human UTI        | AAFC               | N          | 0%   |
|                                           | DH5- $\alpha$ | N/A                                              | HA2018027     | Unknown          | AAFC               | D          | 0%   |
| STEC                                      | O26:H11       | N/A                                              | HA2018016     | Bovine feces     | PHAC-NML at Guelph | N          | 0%   |
|                                           | O26:H11       | N/A                                              | HA2018085     | Human            | PHAC-NML at Guelph | N          | 0%   |
|                                           | O45:H2        | N/A                                              | HA2018020     | Bovine feces     | PHAC-NML at Guelph | N          | 0%   |
|                                           | O103:H2       | N/A                                              | HA2018017     | Bovine feces     | PHAC-NML at Guelph | N          | 0%   |
|                                           | O103:H2       | N/A                                              | HA2018084     | Human            | PHAC-NML at Guelph | N          | 0%   |
|                                           | O111:NM       | N/A                                              | HA2018015     | Bovine feces     | PHAC-NML at Guelph | D+, 13 h   | 100% |
|                                           | O111:H8       | N/A                                              | HA2018083     | Bovine           | PHAC-NML at Guelph | NL++, 18%  | 1%   |
|                                           | O121:H19      | N/A                                              | HA2018019     | Human            | PHAC-NML at Guelph | N          | 0%   |
|                                           | O145:NM       | N/A                                              | HA2018018     | Bovine feces     | PHAC-NML at Guelph | N          | 0%   |
|                                           | O157:H7       | N/A                                              | HA2018013     |                  | ATCC700927         | N          | 0%   |
|                                           | O157:H7       | N/A                                              | HA2018079     | Human UTI        | AAFC               | N          | 0%   |
| Antimicrobial-resistant<br><i>E. coli</i> | N/A           | AMP, CHL, SIX, STR, SXT, TET                     | HA2018155     | Unknown          | PHAC-NML at Guelph | N          | 0%   |
|                                           | N/A           | AMP, CHL, CIP, GEN, NAL, SIX, SXT, TET           | HA2018160     | Unknown          | PHAC-NML at Guelph | N          | 0%   |
|                                           | N/A           | AMP, CRO, GEN, STR, SIX, SXT, TET                | HA2018163     | Unknown          | PHAC-NML at Guelph | N          | 0%   |
|                                           | N/A           | AMC, AMP, FOX, CRO, CHL, GEN, SIX, STR, SXT, TET | HA2018164     | Unknown          | PHAC-NML at Guelph | N          | 0%   |

|  |     |     |           |         |                       |   |    |
|--|-----|-----|-----------|---------|-----------------------|---|----|
|  | N/A | TET | HA2018166 | Unknown | PHAC-NML<br>at Guelph | N | 0% |
|--|-----|-----|-----------|---------|-----------------------|---|----|

\*Antibiotics: AMC=amoxicillin/clavulanic acid, AMP=Ampicillin,  
 CHL=Chloramphenicol, CIP=ciprofloxacin, CRO=ceftriaxone,  
 FOX=cefoxitin, GEN=gentamicin, NAL=nalidixic acid, SIX= sulfisoxazole,  
 STR=streptomycin, SXT=trimethoprim/sulphamethoxazole,  
 TET=tetracycline

C=completion inhibition of bacterial growth, D+=more than a 5-hour delay  
 in initial detection of bacterial growth, D=less than a 5-hour delay, NL+=no  
 delay on detection, but final optical density is less than 40% of control,  
 N=no effect.

**Table S2.** Protein identification of 4HA13 by tryptic digestion and LC MS/MS analyses.

| Protein name                        | NCBI accession number        | Predicted mass | Sequence coverage (90 min LC run) | Sequence coverage (180 min LC run) |
|-------------------------------------|------------------------------|----------------|-----------------------------------|------------------------------------|
| hypothetical protein AC4HA13_0057   | gi 1735348866 gb QEM4 3028.1 | 16478          | 100%*@                            | 100%*@                             |
| hypothetical protein AC4HA13_0070   | gi 1735348883 gb QEM4 3045.1 | 13788          | 80%                               | 80%                                |
| tail tube protein                   | gi 1735348877 gb QEM4 3039.1 | 16516          | 77%                               | 76%                                |
| tail completion protein             | gi 1735348875 gb QEM4 3037.1 | 19408          | 76%§                              | 76%§                               |
| major capsid protein                | gi 1735348871 gb QEM4 3033.1 | 37186          | 71%§                              | 86%§                               |
| major head subunit precursor        | gi 2062562666 gb QEM4 3027.2 | 38825          | 69%                               | 61%                                |
| tail sheath protein                 | gi 1735348876 gb QEM4 3038.1 | 51283          | 66%                               | 66%                                |
| tail tape measure protein           | gi 1735348880 gb QEM4 3042.1 | 128217         | 64%                               | 67%                                |
| single-stranded DNA-binding protein | gi 1735348822 gb QEM4 2984.1 | 13146          | 62%                               | 62%                                |
| hypothetical protein AC4HA13_0060   | gi 1735348872 gb QEM4 3034.1 | 16555          | 60%                               | 61%                                |
| head-tail adaptor protein           | gi 1735348874 gb QEM4 3036.1 | 13877          | 60%                               | 60%                                |
| baseplate wedge protein             | gi 1735348885 gb QEM4 3047.1 | 13468          | 58%*@                             | 57%*@                              |
| hypothetical protein AC4HA13_0029   | gi 1735348838 gb QEM4 3000.1 | 12922          | 53%                               | 53%                                |
| hypothetical protein AC4HA13_0050   | gi 1735348859 gb QEM4 3021.1 | 15743          | 52%                               | 38%                                |
| hypothetical protein AC4HA13_0041   | gi 1735348850 gb QEM4 3012.1 | 9546           | 50%                               | 50%                                |

\* The N-terminal methionine are deleted in the protein sequences.

@ Acetylation at the N-terminus of the protein

§ Lysine acetylation of proteins: major capsid protein (peptide 262-269 at residues IKGLNAIK at m/z 449.7904); tail completion protein (peptide 37-56 at residues GDYAAIKCVSSLNPGFDENR at m/z 1128.0223)
